# Supplementary material
Source: PubMed Central journal article supplement (PMC2556453)
Supplement: supp_178_7_710__1.pdf [file supp_178_7_710__1.pdf]

## **Toll-like Receptor 1 Polymorphisms Affect Innate Immune Responses and Outcomes in Sepsis**

Mark M. Wurfel, Anthony C. Gordon, Tarah D. Holden, Frank Radella, Jeanna Strout, Osamu Kajikawa, John T. Ruzinski, Gail Rona, R. Anthony Black, Seth Stratton, Gail P. Jarvik, Adeline M. Hajjar, Deborah A. Nickerson, Mark Rieder, Jonathan Sevransky, James P. Maloney, Marc Moss, Greg Martin, Carl Shanholtz, Joe G. N. Garcia, Li Gao, Roy Brower, Kathleen C. Barnes, Keith R. Walley, James A. Russell, and Thomas R. Martin

ONLINE DATA SUPPLEMENT

## Supplemental Table 1. TagSNPs genotyped in Normal Volunteers.

SNP location as denoted by IIPGA ([http://innateimmunity.net/IIPGA2/index\\_html](http://innateimmunity.net/IIPGA2/index_html)) or Seattle SNPs (<http://pga.gs.washington.edu/>). SNPs denoted in flanking sequence by square brackets.

| Gene  | SNP      |            | Alleles | Chr | Strand  | Flanking Sequence                                                |
|-------|----------|------------|---------|-----|---------|------------------------------------------------------------------|
|       | Location | dbSNP      |         |     |         |                                                                  |
| CD14  | 4775     | rs2569192  | G/C     | 5   | forward | TTTGTCATGTCTGTGTCCCAGGGCTTTCTA[G/C]CAACCCTAGTACTCGGTAGACAAATGRT  |
| CD14  | 5074     | rs5744448  | A/C     | 5   | forward | TTTTACAGAAGGGAGGCCCAAGTCTCATAA[A/C]CTCAGTCGTAAAGCTGGGATTCCAAGAC  |
| CD14  | 6675     | rs5744455  | T/C     | 5   | forward | AAAAAAGGAAGGGGAATTTTCTTTAGAC[C/T]AACTTCCTTTTCTTGAACCTAATTCTAC    |
| CHUK  | 1866     | rs12770784 | A/G     | 10  | reverse | GTGGTTCCGTTCCAGCCCTCCCGGAAAATAC[A/G]TAGGGGACTTAAAGAGCGGACSGAGTAC |
| CHUK  | 11962    | rs11595324 | G/A     | 10  | reverse | AAATAAAAATTAATAGCCACCTGTATTCA[A/G]TTTTTACCATGTACCAAGCACTGTGTTA   |
| CHUK  | 12184    | rs17886121 | T/C     | 10  | reverse | AGCCCAAGGTCCTCACCCTACCCTGTCTA[C/T]AGCCTCGTAAGGATATTGTTGTCTTTCC   |
| CHUK  | 14883    | rs11591741 | G/C     | 10  | reverse | GTGTACCCAGAAACAACCTCTCATCAATAGT[G/C]TTTACATTTGTATTGATTGTTGTAGTA  |
| CHUK  | 15958    | rs17112745 | C/T     | 10  | reverse | AGTTACTGAAATATTTCCCTTTTGAAAAA[C/T]AGCTTAGCAAGTCTGATTGTATGCATAT   |
| CHUK  | 27073    | rs17880383 | T/C     | 10  | reverse | GAAAGCTAAATTGGAGTTTTTTCACAAAAG[C/T]ATTCAGCTTGACTTGGAGAGATACAGCG  |
| CHUK  | 28086    | rs7923726  | C/A     | 10  | reverse | CTAAAAACATATACTTGTCTGAGCAAACCT[A/C]TGTGTATCTCAGAGTAAACAATCAATAG  |
| CHUK  | 30214    | rs17885986 | T/C     | 10  | reverse | CCTGGGACTGTCCAGTTTATACTTAATGT[C/T]TTGCCATAATTATCAGTAGTAGTCCCTT   |
| CHUK  | 36383    | rs7358099  | A/T     | 10  | reverse | TGCATTTAGGCTTAATTATTGTCCAAAGAA[A/T]ATACCAGCATGATGCATAAGCAACTTTC  |
| CSF3  | 1158     | rs2227319  | A/G     | 17  | forward | GTGTCCACTTCAAGGTGAATGACCAGGGAA[A/G]TCACGTGTCCCAATCCCGCAGTTCCAAA  |
| CSF3  | 2504     | rs2227324  | G/A     | 17  | forward | ACTGCAGGGCCAACATCCTCTGGAAGGGAC[A/G]TGGGAGAATATTAGGAGCAGTGGAGCTG  |
| CSF3  | 4050     | rs2827     | T/C     | 17  | forward | CTGGGGTCCACGAATTTGCTGGGGAATCT[C/T]GTTTTTCTTCTTAAGACTTTTGGGACAT   |
| CSF3  | 4215     | rs1042658  | T/C     | 17  | forward | GGCAGGTGCCTGGACATTTGCCTTGCTGGA[C/T]GGGGACTGGGGATGTGGGAGGGAGCAGA  |
| FOS   | 1058     | rs2239615  | T/A     | 14  | forward | CTCGTACTCCAACCGCATCTGCAGCGAGCA[A/T]CTGAGAAGCCAAGACTGAGCCGGCGGCC  |
| FOS   | 1651     | rs4645854  | T/C     | 14  | forward | CACAACTCGCTAACTAGAGCCTGGCTTCT[C/T]CGGGGAGGTGGCAGAAAAGCGCAATCCC   |
| FOS   | 2376     | rs4645855  | A/G     | 14  | forward | ACTCTAGCGTACTTCTCTGGGAATGTGGG[A/G]GCTGGGTGGGAAGCAGCCCCGGAGATGC   |
| FOS   | 2765     | rs4645856  | C/T     | 14  | forward | TACTGAATGTCCGGTCTTTTTTTGTGATTAT[C/T]CTAGTTATCTCCAGAAGAAGAAGAGAAA |
| FOS   | 5382     | rs4645869  | A/G     | 14  | forward | GCCCTATCCCTTATTAATAAATGCATTGTG[A/G]TTTCTGGTTTCTCTAATACCATATGCC   |
| FOS   | 5506     | rs4645870  | T/C     | 14  | forward | AAACAGCACAAATAATGGCTGATCGTTCTG[C/T]AAACAAAAAGTTACATAATAGCTCAAGA  |
| IKBKB | 2581     | rs3747811  | A/T     | 8   | forward | AAAAAACCAGTTGTATTTTTCTTCTCTCCC[A/T]TCAAGAGCAGTGGTATCTCTTGYCTTC   |
| IKBKB | 8758     | rs17875741 | A/G     | 8   | forward | TAGTAGAAGTCAGCTTGACAGAGAAGGKGG[A/G]AGGAGAGTTCCAGGCCAAGGGAGAGGCT  |
| IKBKB | 13627    | rs5029748  | T/G     | 8   | forward | TCTATGCCAGTATTTTCAAGACTTGTTC[A/G/T]GTTCACATTGCTGAGTTCAGTCTTTTT   |

|       |       |            |     |   |         |                                                                  |
|-------|-------|------------|-----|---|---------|------------------------------------------------------------------|
| IKBKB | 18383 | rs17875672 | G/A | 8 | forward | TAAATGGCACAGTTGGAATTTGAACCAGCC[A/G]GTGTTTCATCTGCTATATTATGCCATAT  |
| IKBKB | 36666 | rs10105951 | C/G | 8 | forward | CAAGTCTGGGTTTAGCTGTCTTGAGGGGTG[G/C]TGCCCTGTTCTGTTCAATCAGCTTCCCTC |
| IKBKB | 46756 | rs17875746 | T/G | 8 | forward | CTGTGTGTATACTGGGAGACGCACACTGT[A/G/T]CCCAACATTGGCTGGAAGTGTCTCCTCA |
| IKBKB | 59283 | rs10958715 | A/G | 8 | forward | TTATAGAAAAGAGAGAGATCAGATTAGATG[A/G]AACCAATCCCAGAATTGATTTTCAAC    |
| IKBKB | 60792 | rs6474389  | G/A | 8 | forward | GTGAGTGCTGTGAGCCACAGTGGTACTGAC[A/G]TCGACTTTCTAATCCCACAGTCACAGA   |

### SNP

| Gene  | Location | dbSNP      | Alleles | Chr | Strand  | Flanking Sequence                                                |
|-------|----------|------------|---------|-----|---------|------------------------------------------------------------------|
| IL10  | 213      | rs1800894  | A/G     | 1   | reverse | CAGTAGGGTGAGGAAACCAAATTCAGTT[A/G]GCACTGGTGTACCCTTGACAGGTGATG     |
| IL10  | 1927     | rs3021094  | C/A     | 1   | reverse | CCAGATTTTTTAAATAAATTGACTCTGAGG[A/C]GGAGGACCTGATTTAAGTGATGGTCCCA  |
| IL10  | 2911     | rs3024493  | T/G     | 1   | reverse | TAACTACTCCCTCTCTCTTCATAAAAGGA[G/T]CCAGAGCTTCAGTCAGGCTCCACTGC     |
| IL10  | 5351     | rs3024498  | G/A     | 1   | reverse | TGTCTCTGGGCTTGGGGCTTCTAACTGCT[A/G]CAAATACTTTAGGAAGAGAAACCAGGG    |
| IL1B  | 3298     | rs3917356  | A/G     | 2   | reverse | CAGCCTAGCTAGGTCAAGTTGTGCAGGTTGG[A/G]AGGCAGCCACTTTTCTCTGGCTTTATTT |
| IL1B  | 4392     | rs3136558  | C/T     | 2   | reverse | AGCCACCACGCCTGGCCAGAGAGGGATGA[C/T]CTTTAGAAGCTCGGGATTCTTTCAAGCC   |
| IL1B  | 5277     | rs1143634  | T/C     | 2   | reverse | TGTGCTCCACATTTCAGAACCTATCTTCTT[C/T]GACACATGGGATAACGAGGCTTATGTGC  |
| IL1B  | 7114     | rs1143642  | T/C     | 2   | reverse | AAATAGATGACTTAAAGGGTCCCATTATCA[C/T]GTCCACTCCACTCCAAAAATYACCACCA  |
| IL1B  | 12885    | rs3917368  | A/G     | 2   | reverse | TGCAATGCGTAGTCTGTAGGGACAGGCTGT[A/G]GCTTATCCTATAGGCTTGGGCTGGAGTC  |
| IL1RN | 1018     | rs4251961  | C/T     | 2   | forward | AGCCCTAAGTCTAAGATAGGGCAGATAGCA[C/T]CAGGTCCATTTTGAGCTGTCAAATGA    |
| IL1RN | 2765     | rs315919   | T/G     | 2   | forward | ACAATAAAGCAAGCAGATAAAATATTTAA[A/G/T]TATAAGCTGCCAGTTTGAACCTCCGGT  |
| IL1RN | 5848     | rs3213448  | A/G     | 2   | forward | TGATCCCCTTCATCATCCAGGAGAGCAGAG[A/G]TGGTCACCCTGATAGCAGCAAGCCTGGG  |
| IL1RN | 10257    | rs315934   | C/T     | 2   | forward | AGCCATCRTTTTGAAACACGTTTGAGAAA[C/T]AGTGTCTTCCTTTGAGGGCCAAGGAGAC   |
| IL1RN | 13888    | rs2232354  | G/T     | 2   | forward | GCAGCATGGCCTGCCTGCACAAACCCTAGG[G/T]GCMATGTCCTAATMCTTGTGGGTCTTT   |
| IL1RN | 15132    | rs432014   | C/T     | 2   | forward | AAATACCCRGGGTCTTTCATTATTGCTGC[C/T]TCCTCTTCTATTAACCTGACCCTCCCT    |
| IL1RN | 15453    | rs380092   | T/A     | 2   | forward | CACTTTGGAAGCTGCATTCAGCAGAGTGCC[A/T]GGCTTGCCTGGGCAATCCAAGGTGGTCC  |
| IL1RN | 17163    | rs4252041  | T/C     | 2   | forward | TCACAASAACCTGGTCACAGGACTCTGCCT[C/T]CTCTTCAACTGACCAGCCTCCATGCTGC  |
| IL6   | 95       | rs2069824  | C/T     | 7   | forward | ATGCAGGAAAGAGAACTTGGTTCAGGAGTG[C/T]CTACGTTGCTTAAGACAGGAGAGCACTA  |
| IL6   | 321      | rs2069827  | T/G     | 7   | forward | TAAATGCCAACAGAGGTCACTGTTTTATC[G/T]ATCTTGAAGAGATCTTCTTAGCAAAG     |
| IL6   | 3114     | rs2066992  | T/G     | 7   | forward | YTTTCTGGCTGTGGTTGAACAATGAAAAG[G/T]CCCTCTAGTGGTGTGTTTTAGGGACA     |
| IL6   | 3437     | rs2069840  | G/C     | 7   | forward | AATGTTATGTAATTTTCATGAGGAGGCCAA[G/C]TTCAAGCTTTTTTAAAGGCAGTTTATTC  |
| IL6   | 5014     | rs2069845  | A/G     | 7   | forward | AAGGTGTTTCCCAGTCTCTTTACACCACC[A/G]GATCAGTGGTCTTTCAACAGATCCTAAA   |
| IL6   | 6021     | rs2069849  | T/C     | 7   | forward | TCATCTCATTCTGCGCAGCTTTAAGGAGTT[C/T]CTGCAGTCCAGCCTGAGGGCTCTCGGC   |
| IL8   | 2968     | rs2227532  | C/T     | 4   | forward | ATTCTGCTCTTATGCCTCCACTGGAATTA[C/T]GTCTTAGTACCACCTGTCTATTCTGCTA   |
| IL8   | 3470     | rs4073     | A/T     | 4   | forward | TAAAGTTATCTAGAAATAAAAAAGCATACA[A/T]TTGATAATTCACCAAATGTGGAGCTTC   |
| IRAK1 | 6151     | rs1059702  | T/C     | X   | forward | CAGTGTCCCTCCTGCAGGGAGCCCRCCCCT[C/T]TCCGTTTTGCTGGCCCCCTCWGTGAGATT |
| IRAK2 | 5352     | rs11465853 | C/G     | 3   | forward | GCCGCCRCTGCGCTCTGAGTCCAGAGAACG[G/C]TGGGTACGGGGCCCTCCTGTCAGCGCT   |
| IRAK2 | 17525    | rs11465861 | G/T     | 3   | forward | TTCTGGGGAAGTAACAGTGAACCAACAGG[G/T]AGAGCTCCCTGCCTACAGGACCTTCCA    |
| IRAK2 | 18096    | rs1681663  | A/G     | 3   | forward | TGAACTGTGAGTAACTCAGGGCCCTCCTT[G/A/G]GTGGGGCCCATCACGCTCCTGAGCAGTT |

|       |       |            |     |   |         |                                                                 |
|-------|-------|------------|-----|---|---------|-----------------------------------------------------------------|
| IRAK2 | 29090 | rs155266   | A/T | 3 | forward | ATGAAAACACAGCCAAGGTCTCAGGCCTCA[A/T]GGAGCTTACAGTCCASTGGGAGATGAAT |
| IRAK2 | 40262 | rs263409   | G/A | 3 | forward | GTCTACYGCATTTTACAGATGGGGAGGCCG[A/G]GGCCAGAAAGGGAAAGACCCTCCCGCCC |
| IRAK2 | 40350 | rs263410   | A/C | 3 | forward | GAATTAGAACCCAGGTCTSTGACTTCCAGA[A/C]CCAGTCTCTCAATGGCTACCCCACTTCA |
| IRAK2 | 45753 | rs11465883 | C/T | 3 | forward | GTACACAGAACCTGGGTGTTAGCACAAATA[C/T]AGATCATGTGTAGAAGAACTAGGGACTT |
| IRAK2 | 49325 | rs1169674  | T/A | 3 | forward | GAGATAGTGCAGGGCCTAGAAGTCAAACAG[A/T]TTCCGTCTGAATTCGGCTCTACCATC   |

### SNP

| Gene  | Location | dbSNP      | Alleles | Chr | Strand  | Flanking Sequence                                                |
|-------|----------|------------|---------|-----|---------|------------------------------------------------------------------|
| IRAK2 | 49704    | rs464286   | G/C     | 3   | forward | CCAGCCTCCTGAAGAAGATGCCCTCATT[G/C]TTGAGAAGCGACCTCCCCACTTCGTCTG    |
| IRAK2 | 53160    | rs11465897 | A/C     | 3   | forward | TACAGTTTCCATTGGATAAGTTGATCCCCT[A/C]CATCCCTCCATCTCTGGTGTCCAAGGT   |
| IRAK2 | 57504    | rs6780464  | A/G     | 3   | forward | YRTCATGGTTCTGGAGGTGTTAGCCAAATGC[A/G]GTAGGACAAGAAAAAGAATTAAGAGGTA |
| IRAK2 | 62841    | rs3844283  | C/G     | 3   | forward | CTGCCAGAGGATTTTATCCGGGTGGGGMAG[G/C]TGACAAAGCGAGTGGACATCTTCAGCTG  |
| IRAK2 | 73835    | rs776514   | T/C     | 3   | forward | AAAAGACTATTGAATGTTCCGTGTCAGATR[C/T]CACTCTCTGTGCTTTAGGTGCACTGTTT  |
| IRAK3 | 3600     | rs1732887  | G/A     | 12  | forward | YAGATACATTTTTATGAAGATTTTCGCTG[A/G]CAAACCAATTCAGGTAGGGGCATGAAAT   |
| IRAK3 | 5719     | rs11465939 | G/T     | 12  | forward | ATTTTCTTAATTAATCTTATTTACCCAAT[G/T]TCGTTGAATGAAGGTTTATGCTAAAGRG   |
| IRAK3 | 26988    | rs2293657  | T/A     | 12  | forward | GCTGATCTCTTTGAGAGGAGGTAAAAATC[A/T]CAATGCTGCTGTCCGAAGAAACCCTTTG   |
| IRAK3 | 27210    | rs1152888  | A/G     | 12  | forward | TTATCTCCCCCTACTTTCCTTCCCTAAGGA[A/G]TACTGCTTAAATCTTCCATCAGCTTTCA  |
| IRAK3 | 55668    | rs11176095 | C/T     | 12  | forward | GKTTTTTCTGTCTCTCCATTGTCTTAAAA[C/T]GTCTGGAAAATACGTTTGCCCAGAACTT   |
| IRAK3 | 55891    | rs1152912  | A/G     | 12  | forward | AATGGACATAGGATGGACAATGGCCAGCCT[A/G]TATCCTTTAAAGCATACTTGTAGCCCTC  |
| IRAK3 | 64458    | rs11465990 | C/G     | 12  | forward | CCCTCTTGTTTTTGGTTAATCCCTGACTA[G/C]CCTGCTTGTCTGAAAATGAGCCAGGTTT   |
| IRAK4 | 3536     | rs4251429  | C/G     | 12  | forward | CCATGTCCTTGCTGTTGCCAGTGGGCCCA[G/C]TTCCAACCTTGCATTTACATTTGTTTT    |
| IRAK4 | 11902    | rs4251460  | C/A     | 12  | forward | TCAGCATTAATCTGGGAAAGAACCTAAAAG[A/C]CTTGGCTCCCTTGCAGGAAATTTTCT    |
| IRAK4 | 13823    | rs1461567  | A/G     | 12  | forward | GAGCTTTGCCCTTATGAGTGGATTAATGTC[A/G]TCATGGCAGGAGTGGGTTAGTTATCTAG  |
| IRAK4 | 23338    | rs4251513  | C/G     | 12  | forward | GGAAGGATCCAGATTTAAAGGGAGAGGATA[G/C]TATGGAAGAGAGAAATGAGATGATGTGT  |
| IRAK4 | 24472    | rs4251520  | C/T     | 12  | forward | CCTGGAGTGCCTTTCTTCCCTCATATAAC[C/T]ATTAACCTCTAATAATCCTTCAACTA     |
| JAK3  | 290      | rs2110586  | A/G     | 19  | reverse | TGATTTTATTTCTATAAAGGGCAAACCTAG[A/G]CATCAATCTCTCTGTGGGAGAGATGGGG  |
| JAK3  | 575      | rs3212701  | A/G     | 19  | reverse | TGACACTTTAGGCCTGGATTGCGCTCAGCA[A/G]ACCACCTCAATGAGGATGCTGGGGAGTC  |
| JAK3  | 6427     | rs3212741  | T/C     | 19  | reverse | TCTCTCTGTCTTCTTCTATCTCTGACTCCT[C/T]CCCATTCCCTCTCACCTTCCCCACAGT   |
| JAK3  | 8873     | rs3212752  | G/A     | 19  | reverse | CAAGCACAAGAAGTGCATGGAGGTGAGAGC[A/G]ATGTGGACCAGACTTTTGGAGTCGGGGC  |
| JAK3  | 10196    | rs3212762  | C/T     | 19  | reverse | AGAGGGGTGTTCTAGGCAGAGGACACMGAA[C/T]ATGCAAAGGGTTAGAAGTGAATACAGA   |
| JAK3  | 11552    | rs2072496  | T/C     | 19  | reverse | CAAACAGACTCTTCATTCATCAAACCTCC[C/T]GGGCATTTTCTGTGTCTGGCCCCCTTA    |
| JAK3  | 11910    | rs3213409  | A/G     | 19  | reverse | GGCGCCACGGTCTGGGAAGTGTGTTAGTGGC[A/G]TCACCATGCCATCAGTGCCTGGATCC   |
| JAK3  | 16765    | rs3212780  | T/C     | 19  | reverse | GGCCGGGTCTCGGGCAAGCCAGCTGGCGC[C/T]TGAGTCTCTGTACTGAGAAGAAAGGSTA   |
| JAK3  | 19853    | rs3212798  | A/G     | 19  | reverse | ACRCTGAATGGGAGTTGTGCTCTTTGGACT[A/G]CTCAGGCACGACCCCAATTATCTGTCCCC |
| JAK3  | 20182    | rs3008     | C/T     | 19  | reverse | TGAGGGTCTCTACTTCAGGAACACCCCCA[C/T]GACATTGCATTTGSGGGGCTCCCGTGG    |
| JUN   | 535      | rs2760501  | C/A     | 1   | reverse | TTCCGTGATTTGCTTGCTTACACTGTGGT[A/C]GCCTGGCCACGAAAGAACCAGGATCCC    |
| JUN   | 3641     | rs11688    | A/G     | 1   | reverse | GCCCCTGTCCCCATCGACATGGAGTCCCA[A/G]GAGCGGATCAAGGCGGAGAGGAAGCGCA   |

|     |      |           |     |    |         |                                                                 |
|-----|------|-----------|-----|----|---------|-----------------------------------------------------------------|
| LBP | 548  | rs1780616 | T/C | 20 | forward | TGCTCAATAAATATCAGTTTCTTTCCAATT[C/T]CTGCTGGGTGCTGCAAGGATCTCAGGAA |
| LBP | 1605 | rs5741812 | T/A | 20 | forward | TACCCCCACAACCAGAGACAATGCCTCATG[A/T]CTCCTTGCTAAATATTTCCAGATTGTT  |
| LBP | 1763 | rs1780617 | G/A | 20 | forward | ACCTTTAWTTCTGCAGCCTCACTTTAAGGG[A/G]CATGTCATAATTCATTTAACCAATGCC  |
| LBP | 1900 | rs2232573 | C/T | 20 | forward | GATTTACTGGCACACTGACTCAATTATGTA[C/T]TTAAGGGCAAGTCCCTGAAATTGAATTC |
| LBP | 2321 | rs2232578 | G/A | 20 | forward | TAGGAGTCAGGCTTCTCATCCACTGATCT[A/G]GGCAGTGAAAAGTGGCTTCTAAGTATGA  |

**SNP**

| Gene   | Location | dbSNP      | Alleles | Chr | Strand  | Flanking Sequence                                                |
|--------|----------|------------|---------|-----|---------|------------------------------------------------------------------|
| LBP    | 10548    | rs5744204  | A/G     | 20  | forward | CCTCCAGCTGCAGCAGTGACNATCGCTGAC[A/G]TGGAGGTGGACATGTCCGGGAGACTTGGG |
| LBP    | 17119    | rs1780623  | T/C     | 20  | forward | ATATTTGTAAATCAGTGATCACTGAGCAC[A/C/T]GTGTGGAATAATGTGACTGCAGTGATCA |
| LBP    | 20377    | rs2232599  | C/G     | 20  | forward | GTTAACTCANTCCAAGGGAATCCATGTAGT[G/C]TCTTTCTTGAAGAAGCAATCTTTGCCCT  |
| LBP    | 21126    | rs2232606  | G/A     | 20  | forward | CTSCCCACGATAGGCTTTGAAAAGNTCCA[A/G]TTGGACCCTATTTCCCTCTCCAGGGTGA   |
| LBP    | 23297    | rs1739639  | T/C     | 20  | forward | GGAGAAGCGACAGTCTTGACATCCCCCTG[C/T]CTCCCAATCTCTTTAGACCTTCAGCT     |
| LBP    | 27937    | rs2232616  | T/C     | 20  | forward | GCATTGCTTAAACTTGATAAAGCCACAC[C/T]YTTTNAATCTTCTCTGATTACATTACAGG   |
| LTA    | 2619     | rs2229094  | C/T     | 6   | forward | CCACCTGAACGTCTTCTCCTCCCAAGGGT[G/C/T]GTGGCACCACCCTACACCTCCTCCTTCT |
| LTA    | 2847     | rs1041981  | A/C     | 6   | forward | AGCMCCCAAGATGCATCTTGCCACAGCA[A/C]CCTCAAACCTGCTGCTCACCTCATTGGT    |
| LTA    | 4545     | rs1799724  | T/C     | 6   | forward | TGGAAGTCGAGTATGGGGACCCCMCTTAA[C/T]GAAGACAGGGCCATGTAGAGGGCCCCAG   |
| LTB    | 2222     | rs3093553  | C/A     | 6   | reverse | GAGCAGACTGTCTCTCCTTCCCCGCTTCA[G/A/C]CCCTCAGGGGCTCCAGCTCCCTGCTGC  |
| LY96   | 440      | rs1812615  | T/A     | 8   | reverse | GAGACTTTATCTCTAAAAAATGAAAAA[A/T]TCACACTTCTGTTGTAATAATTTTTACC     |
| LY96   | 874      | rs11465996 | G/C     | 8   | forward | ACTGTTTACTTCAGATCTATAGGTGCAGCT[C/G]TCTGGCCATGATAATTTGATTTGTTGT   |
| LY96   | 40185    | rs11466004 | T/C     | 8   | forward | TTTTGCTTGGAGTTTGTATCCTACACCAA[C/T]CTAATTCAAATTAGAATAAATTGAGTAT   |
| MD1    | 2422     | rs977785   | A/C     | 6   | forward | CTAAAATTTGAGAAGTGAAACTGAACATCC[A/C]ACTGCCTTGGTGAGGGGAGAGGAAGAAA  |
| MD1    | 2889     | rs3765286  | C/T     | 6   | forward | RCAAAGAGTACAAGAAAGAGAAATTGAATC[C/T]AAATATAGCCATTTACTAACACCACAGA  |
| MD1    | 63232    | rs5743650  | T/G     | 6   | forward | CCGACCAATATTTGTGGCATGAATGAATAA[G/T]TGAATGAATGGTAGGTGTAGATCAGGAA  |
| NFKB1  | 37516    | rs230525   | G/A     | 4   | forward | AAGATTACGGGAAAAGTGATTCTTGTTTAC[A/G]GAGCCCTCTTTCACAGTTTCATGTTTTT  |
| NFKB1  | 39746    | rs4648004  | G/A     | 4   | forward | AAAACAAGGGAGAGAGAGGGCTCACTGGTCA[A/G]TGGGTACTCAGGTATTGGGGAAGCCAGG |
| NFKB1  | 40198    | rs4648006  | T/C     | 4   | forward | CAGTCACAAAATAATTTACAAATGAAACAA[C/T]TAGTGGGCATTAGATGTTCTGTAGAA    |
| NFKB1  | 40458    | rs4648009  | T/G     | 4   | forward | AAGCTGTCATTGTTCCCTTAGCTTGTGATT[G/T]TCACTGAAAATTGAAATGTTCTGCTG    |
| NFKB1  | 94202    | rs4648057  | T/C     | 4   | forward | TTRCTACGTCAGAGGGCATGACATCTAATG[C/T]CATCTGTTTTCCCAAAGATTSTACCAS   |
| NFKB1  | 98030    | rs4648075  | A/G     | 4   | forward | AACATTCCAAACACCATGCCTTCCATTCTT[A/G]CTATTACTGAGATTGATTTGCAAAGCC   |
| NFKB1  | 105701   | rs4648090  | A/G     | 4   | forward | AGCATAGAATCATGGCACTTTTGTAAATTG[A/G]TTTCTATTGACTTTATTTAAATTTT     |
| NFKB1  | 114547   | rs4648127  | T/C     | 4   | forward | CCTTCARCTTCAGACCGTCTCCATTCTGG[C/T]TCCCTCCACAGCACACTCCCCGGCTGGC   |
| NFKB1  | 114680   | rs4648130  | T/C     | 4   | forward | AAGCCCAATACTGGCTRCATCTGTCAGWAG[C/T]GCTGCCATCTTCCAGGAGATTAAGACAA  |
| NFKB1  | 114903   | rs230547   | T/C     | 4   | forward | CTCCCTTCAGTCCATTCTCTGCCAAACAGA[C/T]GGTATGATTCTTCTAAAAAATCAGTGAC  |
| NFKB1  | 115543   | rs4648141  | A/G     | 4   | forward | AACAAATCAGTCAATACCAAATGATAGTY[A/G]TGCCACTGGCATTAAAGTCTTAATTTT    |
| NFKBIA | 1665     | rs2233409  | T/C     | 14  | reverse | TCGATCGTGGGAAACCCAGGGAAAGAAGG[C/T]TCACTTGACAGGGGACAGGATTACAGGG   |
| NFKBIA | 4754     | rs8904     | T/C     | 14  | reverse | TGTTTGGAGGCCAGCGTCTGACGTTATGAG[C/T]GCAAAGGGGCTGAAASAACATGGACTTG  |

|        |       |            |     |    |         |                                                                 |
|--------|-------|------------|-----|----|---------|-----------------------------------------------------------------|
| NFKBIA | 5519  | rs3138055  | G/A | 14 | reverse | GCTGTTTGGCCTGTGGTTGGAGACCTCTCC[A/G]TTGTCATTCTGTCATCCCGTTGATTTAA |
| NFKBIB | 1198  | rs17884442 | T/A | 19 | forward | CGGGGCAACTTATGTTCTTTGCAGCGAGGG[A/T]CCTTAGCAACCAAGGTGCGAGAAACACG |
| NFKBIB | 2243  | rs2053071  | G/C | 19 | forward | TTCCTCATTAACTCTGATCCCTGAGGCTT[G/C]CTAACCTCATACTCCTAAATCTGACTTC  |
| NFKBIB | 3130  | rs12979755 | T/C | 19 | forward | TGTATGCCAGTGATGCAAGCAGGGCCTGA[C/T]CCAGGAGGCACTGAATATTGATCTCAAC  |
| RAF1   | 46239 | rs4684867  | C/T | 3  | reverse | CAGGGCACTGACACCAGCCACTTAGTTCTG[C/T]GTAGTTTATTTTTTCAGTGCCAGTGACA |

**SNP**

| Gene  | Location | dbSNP      | Alleles | Chr | Strand  | Flanking Sequence                                                |
|-------|----------|------------|---------|-----|---------|------------------------------------------------------------------|
| RAF1  | 51933    | rs5746195  | C/T     | 3   | reverse | GAAGGATATTTTCCCCAATTAATATATCA[C/T]GGACTCCTCTCCATCCAGGTCATTATAA   |
| RAF1  | 59734    | rs2648367  | G/A     | 3   | reverse | ACTCTCCTTTTCATTGAATCCCAATACAT[A/G]TATTATTTCCGTGTTCCAAATTTTGATG   |
| RAF1  | 64217    | rs2246390  | T/C     | 3   | reverse | AATAMATTCAATGAAGGAGATTATAAATGT[C/T]ACTGTCTATTTTGGCACACTTGCATCAG  |
| RAF1  | 64310    | rs5746223  | G/A     | 3   | reverse | CTCAAAGACAAAAATTGGAAGTATGGTTA[A/G]TATGTTTATCTTTAAAAGATATGGAAAC   |
| RAF1  | 79220    | rs3729931  | T/C     | 3   | reverse | GTTAGGACTTGTATTATCTGTTGTTTATT[C/T]ACCCCCATTAGCTCAGCTGTTTTCTTT    |
| RAF1  | 79989    | rs1051208  | T/C     | 3   | reverse | CCATGCTCAAGGCCAGCCTTCTGTAGATG[C/T]GCAAGTGGATGTTGATGGTAGTACAAAA   |
| RELA  | 8813     | rs11227247 | G/T     | 11  | reverse | TCACCTCTAAATTAGCAAGATGTGTGTGCC[G/T]GTGCGAGGCTCAAAAAGTACAAAGCTCT  |
| RELA  | 10549    | rs1049728  | G/C     | 11  | reverse | AGTTTTTACTGAACAATCAAAGCACTTGGG[A/G]TCTTGCTCTTTCTACTCTGAACTAATAA  |
| RELA  | 10906    | rs10896027 | C/G     | 11  | reverse | CAGCTGAGAGTGGATGTCAAAGAGGGACTA[G/C]CCAGCGTCAGAGGTAAGAGAAACGATGT  |
| STAT1 | 4377     | rs10195683 | A/G     | 2   | forward | TCCATCTAGAAGGAAAAGTGAAGCTGTGGGT[A/G]AGGTCATCACAGCACAGCGTTTAGGAGA |
| STAT1 | 4798     | rs36234022 | C/T     | 2   | forward | AGCACGTCCTTCTGATCGTTCTCTAAGATA[C/T]GTAACAGAACGCCAGTCCAGCGTGG     |
| STAT1 | 5450     |            | G/A     | 2   | forward | AAGAGGACTTGTGAAATATAATTTTCTCT[A/G]GAAGGCACTGCACCTCCCATTTACCGT    |
| STAT1 | 8902     | rs36077929 | A/G     | 2   | forward | TGAAGAAAAATAAACCAGGGAAAAGAGAGA[A/G]CATGTTTCCAGGGTGGGAGGTGGTTGCA  |
| STAT1 | 9270     |            | C/T     | 2   | forward | CTAAAATTCCTGGAGCAGGTTCCACCAGCT[C/T]TATGATGACAGTTTTCCCATGGAATCA   |
| STAT1 | 28422    | rs7562024  | A/G     | 2   | forward | GATGGATTTATAGCTTTTATCAGTTTCTCA[A/G]AGCAGTCCGTGATATAAATATCTGTGGA  |
| STAT1 | 33177    | rs2280232  | G/T     | 2   | forward | GCTCAGAGATTGACGTCCACTTGAGGGCAG[G/T]TGGACCTGGAGTCACTGGGCCAGCCTG   |
| STAT1 | 33377    | rs2280233  | G/A     | 2   | forward | CAGACTGGTGTCCGCACCATGAGGCCACTG[A/G]GGAAACGTGCTTCTGCTCATGGACCCTG  |
| STAT1 | 37953    | rs3755312  | C/G     | 2   | forward | AAGTCAAGTATCAGTTACATTGAAGATCTA[G/C]GGGTGATCTTGGGCACCTAGGTTGAACT  |
| STAT1 | 40500    | rs13010343 | T/C     | 2   | forward | CAGATCTTATACTTACCCCAATGAGCCCC[C/T]GATAGGATTTAATAAACCACCACAAATG   |
| STAT1 | 43236    | rs17749316 | C/G     | 2   | forward | CCTTAAAGTTTTAGGAGGCTAAGCTGTCTA[G/C]AAACACAGTAGAACTTAATCCCCCGA    |
| STAT1 | 48027    | rs7575823  | A/G     | 2   | forward | AGGCAGCTGGGCAGAAGGCACTGGTGGGA[A/G]GGTGAAGGGTTCTTAGTAATTCTGCTT    |
| STAT2 | 11773    | rs4759016  | G/T     | 12  | reverse | GGCACAACAAGGAAGAGGGGATTTGGGA[G/T]ATGGACAAAGGAGATGGCGAGATCTGA     |
| STAT2 | 15182    | rs2066807  | C/G     | 12  | reverse | CCAGGAGCGCCGGCTGCTGAAGAAGACCAT[G/C]TCTGGCACCTTTCTACTGCGTTCAGTG   |
| STAT3 | 47616    | rs8069645  | C/T     | 17  | reverse | GAAGATCATGTTCAAAGACAGAAACAGAAA[C/T]GTGTATTCTTGGGAGAAGGTAGAAAGT   |
| STAT3 | 50838    | rs2306580  | C/G     | 17  | reverse | TTTGAATTTTTTGACATACTTGCCCATGAG[G/C]TTTTTGAAGGCATAGACCATGTCTTAGC  |
| STAT3 | 60990    | rs2293152  | C/G     | 17  | reverse | AGCTCCCCTTACAAAAGGGCCTCTGGCTGC[G/C]GGAGAGGGCTAGGGAGAGCCTCACAGGA  |
| STAT3 | 65854    | rs17881940 | C/G     | 17  | reverse | ACCCGCCAGAAAAGGGATCCGGCCCATAG[G/C]GCTGTTTATTGGGCCATGTCTACTGAG    |
| STAT3 | 67661    | rs8064496  | C/T     | 17  | reverse | GCAAAACACATTTGSGTGACTTCTAAATCC[C/T]TCCAGCTGAAGGATTGTTTGTCTTTGTT  |
| STAT3 | 74526    | rs17882369 | A/C     | 17  | reverse | GTTAAGGTGGGAATGAGAAAGGACCCTTCC[A/C]GAGGCAGGGTCTCCAGGGAGGAGGGTA   |

|       |       |           |     |   |         |                                                                  |
|-------|-------|-----------|-----|---|---------|------------------------------------------------------------------|
| STAT4 | 13429 | rs3024847 | A/T | 2 | reverse | CTTTAGGAATAACATTTTAAAAAGAGAAGG[A/T]ACTTTGACAATAATTCAGTTCATTCAAC  |
| STAT4 | 14441 | rs932169  | G/C | 2 | reverse | TCACATGCAAGATATCAATCGTAAAAGACT[G/C]GAATAAAATTTTGAAACCAGCAATATACT |
| STAT4 | 14897 | rs3024851 | A/T | 2 | reverse | TAATACAAGCTGGCATTCCCAGTCTATGTA[A/T]GCACACATGCAATGAAATGTAGATACTA  |
| STAT4 | 19113 | rs3024861 | A/T | 2 | reverse | GGTATAAAAAGGAAGGTGGAGAGGAAAAAC[A/T]TCTGGCCTGATTTTATGTGACTATGCC   |
| STAT4 | 38829 | rs3024877 | A/G | 2 | reverse | TGACTATGYGCTCCTTGAAGGCAGGACACC[A/G]TGAATSAATCAGTGCATGAATGAACAAA  |

### SNP

| Gene  | Location | dbSNP      | Alleles | Chr | Strand  | Flanking Sequence                                               |
|-------|----------|------------|---------|-----|---------|-----------------------------------------------------------------|
| STAT4 | 39162    | rs3024879  | T/C     | 2   | reverse | ATAAAGTAGAAAACCACAGAACCAAGAGTA[C/T]TAAATTGAGTTAGTTCTGTAACAATAGC |
| STAT4 | 46178    | rs925847   | A/G     | 2   | reverse | ATCTAAGGGCATGTGGAGGTCAAAGCCTTA[A/G]AAATGAAGTGGTATGTCAGCAGTTCCTG |
| STAT4 | 48516    | rs3024904  | T/A     | 2   | reverse | TGCATTTCTAGAACCCGGAGCCTCATCAAT[A/T]ATATATGAATAACAGTCAATGGCATAAT |
| STAT4 | 50631    | rs3024912  | G/T     | 2   | reverse | CCTGCCCAAGGCCAGTTCCTTTACTCCTT[G/T]GTGAGCGCCTAAATGCTTTTAGGGTGGGA |
| STAT4 | 52147    | rs3024919  | A/C     | 2   | reverse | TTGCAGCAGCAGCCCCAATCCCATGGCTCC[A/C]CTAGGCATTACCCAGAGAGGACACTCT  |
| TIRAP | 3846     | rs8177349  | A/G     | 11  | forward | GCGGCTCCCCTTTCGCTTGCCTCGCTGGAA[A/G]AGCCTGGCGCTCAGTGCCTTGTGGATAT |
| TIRAP | 4346     | rs8177352  | G/A     | 11  | forward | CATTTCTGATTCAGAGCAATCAATAAAAC[A/G]TGACTACATCCCTGGCTTCTAACGCCAT  |
| TIRAP | 7482     | rs595022   | T/C     | 11  | forward | CCCCATCACAAGGTTCTTAATCACAGCTGC[C/T]GAATCCCCTTTTGCCACGGAAGGTAACA |
| TIRAP | 9537     | rs646005   | C/T     | 11  | forward | GTCTTCTCTGGTTCCTGTACCCATTCCAAC[C/T]CTTTGCTCTGCCTCCTTTGCTGCTATGG |
| TIRAP | 13365    | rs7932766  | T/C     | 11  | forward | CCCCCTGCTGTGCGCCCTCAGCAGAGCTGC[C/T]TACCCACCTGAGCTCCGATTCATGACT  |
| TIRAP | 14194    | rs611953   | A/G     | 11  | forward | AAATGTGACAAGAGGTATAGGGAGTGAGTY[A/G]CAGCGCTTTGCTCGTGACCCTGGGATCA |
| TIRAP | 15935    | rs4937116  | T/C     | 11  | forward | CTTTGTGCCCTGAATTGCAGTCTCCCCTT[C/T]CCCACCAGAAATAACCAGCATTTTGAAT  |
| TIRAP | 16971    | rs8177382  | A/C     | 11  | forward | TCAATAATACCCTACTCATATCTCTCACTC[A/C]CCACAAGATCATTTGAAGCAAACCTCAG |
| TLR1  | 1260     | rs5743551  | G/A     | 4   | forward | TGGGGAAAAACAGGAATTCAGAGTGTGAG[A/G]AGCTTCCCTTACTGCCCTGCCCACTTCC  |
| TLR1  | 1725     | rs5743553  | A/T     | 4   | forward | AGGCAGTCAGCTGGAATCCCATAGCTTTAT[A/T]TGCCCATTTATTGTGTTGTTATTTTGT  |
| TLR1  | 3076     | rs5743567  | T/C     | 4   | forward | AGGCCACTAACACTGTTCTGGGGAGCTAGA[C/T]GTGAGGTAGAATTGCAGGTTTTGAAAAT |
| TLR1  | 6165     | rs5743594  | T/C     | 4   | forward | AGGATTTCAACATAAGAATTTACAGGGCA[C/T]AAACATTCAAGCTATAACATCCATTGAA  |
| TLR1  | 6752     | rs5743599  | T/C     | 4   | forward | CATCCCAACACAGCTCCCTCTGTTCTCATA[C/T]GCCACTGGAATGCTGACCACAAAATGGT |
| TLR1  | 11040    | rs4624663  | G/A     | 4   | forward | TAACCTTGATTTAAACAGTTCTGACACATA[A/G]GGGATCCACTTGTCTTTGCTATAACT   |
| TLR2  | 7884     | rs2083287  | G/A     | 4   | forward | ATATAAAAACCTTGTCAGATGCACCTAAACT[A/G]TTGCTTAAAGGAAACTTACAACTTAAG |
| TLR2  | 21502    |            | A/C     | 4   | forward | AATATAGTGTGTTGCTGGTATAGGGATAGA[A/C]AAATGAACATTGGATCAGAATAGCACTG |
| TLR2  | 24212    | rs3804099  | C/T     | 4   | forward | TGAGCCAAAAAGTTTGAAGTCAATTCAGAA[C/T]GTAAGTCATCTGATCCTTCATATGAAGC |
| TLR2  | 24965    | rs3804100  | C/T     | 4   | forward | TTTGAACTTATCCAGCACACGAATACACAG[C/T]GTAACAGGCTGCATTCCCAAGACTGG   |
| TLR4  | 851      | rs2770150  | G/A     | 9   | forward | TTGACACATGGTCTGCCTTCTGGAAGAGCA[A/G]CATAGAACCTAGATGTCTTTGATTAAGG |
| TLR4  | 7260     | rs7864330  | G/T     | 9   | forward | AGCAGACATACGAATGAAGATCTGCATGTT[G/T]GAACTCTGACTTTGCGCATATTACTTCA |
| TLR4  | 7764     | rs1927911  | A/G     | 9   | forward | ATCACTTTGCTCAAGGGTCAATGAGCCAAG[A/G]AAAAGAATGCAGTTKCAAAATCTGGGC  |
| TLR4  | 9263     | rs11536878 | A/C     | 9   | forward | GGTGATAAATTATGTTTAAACTAAAGGTAA[A/C]TAATTGTATTTTTCAGAAGAGGGCCTT  |
| TLR4  | 10478    | rs1927907  | T/C     | 9   | forward | TTTTTTTTTCAAACAAGAAGTAGTTTTTCA[C/T]YAAACAATGTCTCTTATGTAATTCATCT |
| TLR4  | 15745    | rs7869402  | T/C     | 9   | forward | CACAGATGGCTGGGATCCCTCCCCTGTACC[C/T]TTCTCACTGCCAGGAGAACTACGTGTGA |

|      |       |            |     |   |         |                                                                  |
|------|-------|------------|-----|---|---------|------------------------------------------------------------------|
| TLR4 | 15844 | rs11536889 | C/G | 9 | forward | GGGCAATGCTCCTTGACCACATTTTGGGAA[G/C]AGTGGATGTTATCATTGAGAAAAAATG   |
| TLR4 | 17723 | rs11536897 | A/G | 9 | forward | TTCTGCATAAGTGTGTTTTATTCAAGCAAAT[A/G]TACAAGGCTCTGAGAAGGAAGATCAACA |
| TLR4 | 17828 | rs1927906  | C/T | 9 | forward | GCCTCCTTCCATCAGTTCCTCTCCCAGA[C/T]GGAAATCTAGAAATGGCAGGTGAGGTG     |
| TLR4 | 17923 | rs11536898 | A/C | 9 | forward | AGGAGAAGAAAGAGTAAAGTCAGGCCTCAG[A/C]CAGCCTCTTTTTAGCTCTTTAATCCTC   |
| TLR5 | 3048  | rs5744105  | G/C | 1 | forward | CAGCAGGGCCATGGAAATCCCAGAAAGTCA[G/C]TGAGCTGCTCAACAAAAGGCCCTAAACA  |

**SNP**

| Gene   | Location | dbSNP     | Alleles | Chr | Strand  | Flanking Sequence                                                |
|--------|----------|-----------|---------|-----|---------|------------------------------------------------------------------|
| TLR5   | 3645     | rs5744109 | C/T     | 1   | forward | CCNATGTGGTTTCATCAATTTTCTCCTGCA[T/C]TTACCCAGCCCCCTCCGAATTCTGAGAAG |
| TLR5   | 34054    | rs5744168 | A/G     | 1   | reverse | TTCCTGGAAAAATTACAGACCTTGGATCTC[C/T]GAGACAATGCTCTTACAACCATTCAATT  |
| TLR5   | 34655    | rs2072493 | G/A     | 1   | forward | TTTGTGAATGTGAACCTTAGCACTTTTATCA[A/G]TTGGCTTAATCACACCANTGTCACTATA |
| TLR5   | 35403    | rs1053954 | G/A     | 1   | forward | ACTCTCTCAACAGATACTAAAGAAAGAAAA[A/G]GAAAAAGAAAGNCAATAACATTCCGT    |
| TLR6   | 1166     | rs5743795 | A/G     | 4   | forward | TGCAAGGTTTGTGTTATTTTCAGGGCAAAC[A/G]TAGAGCAAGTCCACTGGCAAATCTGGGG  |
| TLR6   | 2157     | rs1039560 | G/A     | 4   | forward | AGCCCTTGCTCAGGTGGCTGCAGCTAGTAT[A/G]TTTGCCTTAATTGTTTACAGCAAACAC   |
| TLR6   | 3829     | rs3775073 | G/A     | 4   | forward | CTGGAATTCTTTGGAATCTGGTAGACATAA[A/G]GAAAAGTGCCTTGGGYYTGGAGTATAG   |
| TLR7   | 5307     | rs1634323 | G/A     | X   | forward | TGTTAAATGAAAAAGCAAGCTAGAAATGG[A/G]TAAGTACCGTGTATTCCCTCATGTTTTTA  |
| TLR7   | 6893     | rs5743733 | G/C     | X   | forward | CCCGCCATCACAGAAAGCCCTCGCTCACA[G/C]GTCTTGGCTCAAGCAACTCTTTGTCTTA   |
| TLR7   | 7212     | rs1634322 | A/T     | X   | forward | CATCTCAAGATAAATTTCTTTTGCCTAAGA[A/T]TGCTGCTGAAAAAATCCATTGTAGCCA   |
| TLR7   | 7335     | rs179018  | C/T     | X   | forward | AAGGTGAGGGTTTCATTTGCTGGGGTGTAG[C/T]GGGTGGGAGAATTCCTTATTGCAATCAC  |
| TLR7   | 9149     | rs5743740 | G/A     | X   | forward | TCCCTTTATTTTTGTAACCTTAGTAGTAG[A/G]TCATGCATAGCTTTTTATGTGCATACCC   |
| TLR7   | 11629    | rs179016  | C/G     | X   | forward | AACAAACCAATTTCTCTATGCCCAAAC[C/G]CTAAGTAGCACAAAATAGAAACATTAGA     |
| TLR7   | 20091    | rs179010  | T/C     | X   | forward | GTTATACGGTTCCTCTGATTATGTATCACC[C/T]AGGCAGTGCCCTGACTCTACTACTATCT  |
| TLR7   | 20241    | rs1634319 | C/T     | X   | forward | CAAAAACAATCCAAGACAAGAGCCAGATTA[C/T]GGAATGTCAGTGCCAGAATGGCAGGAAT  |
| TLR7   | 23236    | rs864058  | A/G     | X   | forward | TGTGTGGTTTGTCTGGTGGGTTAACCATAC[A/G]GAGGTGACTATTCCTTACCTGGCCACAG  |
| TNF    | 282      | rs1800629 | A/G     | 6   | forward | AAATGGAGGCAATAGGTTTTGAGGGGCATG[A/G]GGACGGGGTTCAGCCTCCAGGGTCTAC   |
| TNF    | 1078     | rs1800610 | A/G     | 6   | forward | GCTGATAGGGAGGGATGGAGAGAAAAAAC[A/G]TGGAGAAAGACGGGGATGCAGAAAGAGA   |
| TNF    | 1440     | rs3093662 | G/A     | 6   | forward | AGCTGTTGAATGCCTGGAAGGTGAATACAC[A/G]GATGAATGGAGAGAGAAAACCAGACACC  |
| TOLLIP | 645      | rs5743851 | C/T     | 11  | forward | AAGGCGTCCACCTGGGTACGCTTGTATA[C/T]GTAAGATAAAAGCCAAAAACATCACGG     |
| TOLLIP | 1211     | rs5743854 | C/G     | 11  | forward | CCTCCGGCAGGCAGCTGAGGGAAAGATCGC[G/C]CTGCAGGGGATGTCGGGCCTGTCACTGC  |
| TOLLIP | 2662     | rs5743856 | G/A     | 11  | forward | TCTCCTGAGAGTTGCCTGGCAGTTTCTTCT[A/G]TAGCATTAAATTTGCAGGAGAGCTGGTG  |
| TOLLIP | 2930     | rs5743857 | T/C     | 11  | forward | AGGCCAAGTGGGAGCTTACACGTCACATGG[C/T]GAAAGCAGCAAGAGAGTTGGGGGTGGGG  |
| TOLLIP | 5754     | rs5743881 | T/C     | 11  | forward | GGTGTGCGCTGGCTGTCTGAAACACAATT[C/T]GTGAAAGAAAGGCAAGTGAGATGCTTTT   |
| TOLLIP | 6671     | rs5743890 | G/A     | 11  | forward | GCTGCCCGGCTAAAGAATAAATAAAGAAGA[A/G]GTTAATCATTGTCTGTGCCACCTCCGGA  |
| TOLLIP | 8937     | rs5743899 | G/A     | 11  | forward | AGGCTGGCACTTCACTCTGAAACCTCGC[A/G]CACTGAGGGGTGAGTCACTGGGCAGAG     |
| TOLLIP | 10552    | rs5743911 | G/A     | 11  | forward | GGACTGCATGTGTTCAAGACTCCACGTCCT[A/G]GGCTGAGCTGGGCTCTTCCGGGGCTCTG  |
| TOLLIP | 10905    | rs5743915 | T/C     | 11  | forward | GAGACCTCTTTTCTTTCTGTGGAAAGGTA[C/T]GCTGCAGTGGTTAGAGCTCTGGCGTCA    |
| TOLLIP | 31878    | rs3829223 | A/G     | 11  | forward | GAGGGCCAGTCGGCGCCACATCCCCTCATT[A/G]TCAGCAGAGCAGGTTTCTCGGGACACCC  |



|        |       |            |     |    |         |                                                                   |
|--------|-------|------------|-----|----|---------|-------------------------------------------------------------------|
| TOLLIP | 36047 | rs5744034  | C/T | 11 | forward | AAATSACATTTTGAAGGCCTTTAATTA AAA[C/T]AAGATTCTTCTTTCCTTCATTTTATGCT  |
| TOLLIP | 36848 | rs5744038  | G/A | 11 | forward | TCCCAGATTGAATTAGAGGAGGGAAGTCCC[A/G]GGTGCTCCTCCCTCAACAGTGGCAGTGG   |
| TRAF2  | 138   | rs10781520 | G/A | 9  | forward | TCACTGAGCCTGCAGGTGCGGACTTGGGAC[A/G]TTCCATGGCTGCTTGCAGCAA ACTCAG   |
| TRAF2  | 26041 | rs17250841 | T/C | 9  | forward | GGGCTGGGGGACGGGACAGGGCTGTCTCCT[C/T]ACCTCTTCCACTTGTCTGTTAAATGTC    |
| TRAF2  | 35927 | rs17244180 | A/G | 9  | forward | CCCTTCATTTCTGAGTCCTGTCTCATCTAAGG[A/G]ACCCAAACCCTGGAAGGTCCTAGAGGCC |

**SNP**

| Gene  | Location | dbSNP      | Alleles | Chr | Strand  | Flanking Sequence                                                 |
|-------|----------|------------|---------|-----|---------|-------------------------------------------------------------------|
| TRAF2 | 37779    | rs10283820 | A/G     | 9   | forward | AAGCAATGCTGGTGAACACAGCTTGTGTGC[A/G]GCACGCGTGCAGGCTGAGGACAGGCAGA   |
| TRAF2 | 41191    | rs7852970  | G/A     | 9   | forward | GGCACAGCCGGCTCACGGAGGGGCCACCAC[A/G]CTGGGCCAGGGTCTCACTGTACAAGTGG   |
| TRAF6 | 973      | rs5030409  | T/C     | 11  | reverse | TGCAGGTGGATTGACTTTCCAAGGCAACTG[C/T]CCTTCATACATCAACTGAGTGATACATC   |
| TRAF6 | 1105     | rs5030411  | C/T     | 11  | reverse | CTTTGACCTAGGAATGATATGCATCCTTCT[C/T]GTCATAGCTCACAGGCCAGA ACTAGWCA  |
| TRAF6 | 2288     | rs331449   | G/A     | 11  | reverse | TAAGTATTTTACCTGAATCACACATTTATT[A/G]TAGGAAAACCGGATTGGAACCAAGCAT    |
| TRAF6 | 4115     | rs5030419  | G/C     | 11  | reverse | CTCTGAGAGCAGATTACTATTACTGAATGT[G/C]TTGTTACACAGGTTCCATGTAGAAACGA   |
| TRIF  | 4839     | rs4807000  | T/C     | 19  | forward | GCTCACACTTGCTGAACGTGACCGCAAGGG[C/T]TGGGAAGAGAGCGCATGGGTGCGGGGGCG  |
| TRIF  | 5497     | rs10404543 | T/C     | 19  | forward | TTCTACCTCACACCCCATATTTCTCTCAA[C/T]GCCCTGRATTTCTCCCTGACACCCAAGG    |
| TRIF  | 18230    | rs10415014 | T/G     | 19  | forward | CAGCTCCTGCAGAACCTGGAACAGTGAATS[G/T]GTAGGGGACACTGGGCGTGCAGAAGGCC   |
| TRIF  | 20001    | rs2292151  | T/C     | 19  | forward | AGCCCTGCGGGAACAGAGCCAACACCTGGA[C/T]GGTGAGCGGATGCAGGCGGCGGCACTGA   |
| TTRAP | 1319     | rs3181227  | T/C     | 6   | reverse | AAGTCCCTCCCAGCCTTGGAACTGTCTCCA[C/T]GAGTCATAACCATACTTATCTATGTTTA   |
| TTRAP | 1456     | rs3181228  | A/G     | 6   | reverse | ACAGGCGTACTAGAACACAACCTAACAGA[A/G]ATAATTATTCAAAGCTCACAAACGGCACC   |
| TTRAP | 3004     | rs6456628  | T/G     | 6   | reverse | TGAAACTTCGTAAGATCTTTATTACCTGT[G/T]CCTGGAATTTTTTCTTTCCCTTCCTT      |
| TTRAP | 3114     | rs1061925  | C/A     | 6   | reverse | GCTTTTCTGATGTCTTAAGTCTGGGTAAG[A/C]GTCCCTTTTAGGTA CTCTTATAGCATC    |
| TTRAP | 3418     | rs17249862 | C/T     | 6   | reverse | TTGGTCTTTTCAGCTACACTGGCTTACAGA[C/T]GTGATAAGATATTTCTTTAGGTTCTT     |
| TTRAP | 10740    | rs3212229  | G/T     | 6   | reverse | TGAAAGAAACATTGAAAGCATCTCTTAGTG[G/T]GTAGGACCATTGAAGTCTCTCAATATGG   |
| TTRAP | 11170    | rs3212231  | C/A     | 6   | reverse | TCAGTGAAAGAGATAAATCAAAGTTGGTCT[A/C]TTGGGACATAGAGAGGAAAAAGCACAAA   |
| TTRAP | 14691    | rs3181238  | G/A     | 6   | reverse | TTTAAATGCAGATAGAATTCTCAGTCTATT[A/G]TTTTCTTAAAGAATATTTGAGTTTGCTGA  |
| TTRAP | 17823    | rs3181245  | C/G     | 6   | reverse | GTTAGTGGGCAAAAGGCTATGTGTATCTTA[G/C]JAGAGTATTCTTCTTCTTTTTCAGTTTACC |
| TTRAP | 18382    | rs3087943  | C/T     | 6   | reverse | AAAGCCTGTCTCAGAGTTTCAACGGTGCTTA[C/T]JAGCTGCCAGCTGGATTCCAAACAGGTAC |
| TTRAP | 18472    | rs707887   | G/A     | 6   | reverse | TCCATTGAGGACCCGAAATAGTTAATTTT[A/G]AAATAAGTCTTCAAAGAAAAACATAAGA    |
